# Supplementary material for: Antimicrobial Activity of Spanish Propolis against Listeria monocytogenes and Other Listeria Strains
Source: MDPI journal article supplement (doi:10.3390/microorganisms11061429), 2023-05-29
Supplement: s1 [file s1]

Table S1 Geographical location of the propolis samples and identification code.

| <b>Propolis</b> | <b>City/Region</b>                | <b>Zone Code</b> |
|-----------------|-----------------------------------|------------------|
| 1               | Omaña                             | I                |
| 2               | Valduerna                         | I                |
| 3               | Matallana De Torio                | I                |
| 4               | Tafalla                           | III              |
| 5               | Xinzo De Lima                     | V                |
| 6               | Degaña                            | I                |
| 7               | Carballiño                        | V                |
| 8               | Boimorto                          | V                |
| 9               | Ourense1                          | V                |
| 10              | Ourense2                          | V                |
| 11              | Olot                              | II               |
| 12              | Mutilva                           | III              |
| 13              | Vegacervera                       | I                |
| 14              | Mazon                             | I                |
| 15              | Olmillos De Castro                | I                |
| 16              | Ourense3                          | V                |
| 17              | Ourense4                          | V                |
| 18              | Valdespina                        | I                |
| 19              | Mostoles                          | I                |
| 20              | San Quirce Del Valles (Barcelona) | II               |
| 21              | Ferreras 1                        | I                |
| 22              | Ferreras 2                        | I                |
| 23              | Secarejo 1                        | I                |
| 24              | Sueros De Cepeda1                 | I                |
| 25              | Ferreras3                         | I                |
| 26              | Ferreras4                         | I                |

|    |                   |   |
|----|-------------------|---|
| 27 | Secarejo2         | I |
| 28 | Brañuelas1        | I |
| 29 | Brañuelas2        | I |
| 30 | Brañuelas3        | I |
| 31 | Sueros De Cepeda2 | I |

Table S2 Physicochemical characterization of propolis samples.

| <i>Region<br/>Code</i> | <i>Wax (%<br/>w/w)</i> | <i>Resin (%<br/>w/w)</i> | <i>Ash (% w/w)</i> | <i>Impurities (%<br/>w/w)</i> | <i>Water+ volatil<br/>compounds and<br/>others (% w/w)</i> |
|------------------------|------------------------|--------------------------|--------------------|-------------------------------|------------------------------------------------------------|
| <i>I</i>               | 27.82-10.64            | 76.26-50.73              | 2.92-0.33          | 10.03-<br>3.29                | 22.29-5.43                                                 |
| <i>II</i>              | 14.83-13.74            | 73.79-66.86              | 1.32-0.44          | 11.07-<br>3.25                | 9.04-5.99                                                  |
| <i>III</i>             | 21.13-8.68             | 83.52-65.73              | 0.92-0.58          | 5.89-5.35                     | 7.21-1.23                                                  |
| <i>IV</i>              | 27.90-7.74             | 71.63-48.20              | 0.79-0.60          | 15.12-<br>4.11                | 12.94-6.96                                                 |

Table S3 MIC and MBC values for the all the EEPs after 48 h of EEP against the strains of *Listeria grayii*, *Listeria innocua* and *Listeria monocytogenes* under study on three different pH conditions.

| EEP | PH   | <i>Lm 10</i> |     | <i>L. innocua30</i> |     | <i>Lm51</i> |     | <i>Lm52</i> |     | <i>Lm74</i> |     | <i>Lm75</i> |     | <i>L. innocua 910</i> |     | <i>Lgrayii 931</i> |     | <i>Lm934</i> |     | <i>Lm935</i> |     | <i>Lm4032</i> |     |
|-----|------|--------------|-----|---------------------|-----|-------------|-----|-------------|-----|-------------|-----|-------------|-----|-----------------------|-----|--------------------|-----|--------------|-----|--------------|-----|---------------|-----|
|     |      | MIC          | MBC | MIC                 | MBC | MIC         | MBC | MIC         | MBC | MIC         | MBC | MIC         | MBC | MIC                   | MBC | MIC                | MBC | MIC          | MBC | MIC          | MBC | MIC           | MBC |
| 1   | 7.04 | 4            | 4   | 1                   | 1   | 1           | 1   | 1           | *   | 1           | 7   | 2           | 2   | 2                     | 2   | 1                  | 4   | 4            | 4   | 2            | 4   | 2             | 4   |
|     | 6.01 | 2            | 2   | 2                   | 2   | 3           | 4   | 2           | 2   | 2           | 7   | 2           | 2   | 2                     | 1   | 2                  | 2   | 2            | 2   | 2            | 2   | 2             | 4   |
|     | 5.01 | 1            | 1   | 1                   | 1   | 2           | 1   | 1           | 1   | 1           | 2   | 1           | 1   | 2                     | 1   | 2                  | 1   | 2            | 1   | 2            | 1   | 2             | 1   |
| 2   | 7.04 | 4            | 4   | 4                   | 4   | 4           | 4   | 1           | 7   | 4           | 4   | 2           | 4   | 4                     | 4   | 2                  | 4   | 4            | 7   | 2            | 4   | 4             | 4   |
|     | 6.01 | 2            | 2   | 4                   | 4   | 4           | 4   | 4           | 4   | 4           | 4   | 4           | 4   | 2                     | 2   | 2                  | 2   | 2            | 4   | 4            | 2   | 3             | 2   |
|     | 5.01 | 2            | 2   | 7                   | 2   | 1           | 1   | 1           | 2   | 1           | 2   | 2           | 2   | 2                     | 2   | 2                  | 2   | 2            | 2   | 2            | 2   | 2             | 2   |
| 3   | 7.04 | 2            | 2   | 2                   | 4   | 4           | *   | 2           | 4   | 4           | 4   | 4           | 4   | 2                     | 2   | 2                  | 2   | 1            | 1   | 4            | 2   | 4             | 2   |
|     | 6.01 | 1            | 4   | 2                   | 2   | 2           | 7   | 2           | 1   | 2           | 2   | 4           | 2   | 2                     | 1   | 2                  | 1   | 3            | 1   | 2            | 1   | 4             | 2   |
|     | 5.01 | 1            | 2   | 1                   | 1   | 1           | 1   | 1           | 1   | 2           | 2   | 2           | 1   | 2                     | 1   | 2                  | 1   | 2            | 1   | 2            | 1   | 2             | 1   |
| 4   | 7.04 | 2            | 4   | 2                   | 4   | 4           | 4   | 4           | 4   | 4           | 4   | 2           | 4   | 2                     | 4   | 1                  | 2   | 2            | 4   | 2            | 2   | 2             | 2   |
|     | 6.01 | 3            | 4   | 2                   | 4   | 2           | 7   | 2           | 7   | 2           | 4   | 2           | 7   | 4                     | 4   | 3                  | 2   | 4            | 4   | 4            | 4   | 4             | 4   |
|     | 5.01 | 2            | 1   | 2                   | 2   | 2           | 1   | 2           | 1   | 4           | 2   | 2           | 2   | 1                     | 2   | 1                  | 1   | 1            | 2   | 1            | 1   | 1             | 1   |
| 5   | 7.04 | 1            | 1   | 1                   | 2   | 2           | 2   | 1           | 4   | 1           | 4   | 2           | 4   | 1                     | 7   | 2                  | 4   | 1            | 7   | 1            | 2   | 1             | 4   |
|     | 6.01 | 2            | 1   | 2                   | 4   | 2           | 2   | 2           | 2   | 2           | 4   | 2           | 4   | 2                     | 2   | 2                  | **  | 2            | 4   | 2            | 4   | 2             | 2   |
|     | 5.01 | 1            | 1   | 1                   | 1   | 1           | 1   | 2           | 1   | 2           | 2   | 2           | 4   | 1                     | 4   | 1                  | 1   | 2            | 1   | 2            | 1   | 1             | 1   |
| 6   | 7.04 | 3            | 7   | 4                   | 7   | 1           | 4   | 4           | 4   | 2           | 4   | 4           | 2   | 5                     | 7   | 2                  | 1   | 4            | 4   | 2            | 4   | 2             | 7   |
|     | 6.01 | 2            | 2   | 2                   | 2   | 2           | 4   | 2           | 4   | 4           | 4   | 2           | 7   | 2                     | 2   | 2                  | 2   | 2            | 2   | 4            | 2   | 4             | 4   |
|     | 5.01 | 2            | 2   | 1                   | 1   | 1           | 1   | 2           | 1   | 1           | 2   | 1           | 2   | 2                     | 1   | 2                  | 1   | 2            | 2   | 2            | 1   | 2             | 2   |
| 7   | 7.04 | 3            | 4   | 4                   | 7   | 2           | 2   | 1           | 1   | 2           | 2   | 2           | 2   | 1                     | 7   | 1                  | 4   | 2            | 2   | 1            | 2   | 1             | 4   |
|     | 6.01 | 1            | 2   | 1                   | 2   | 2           | 1   | 2           | 4   | 1           | 2   | 1           | 2   | 1                     | 2   | 2                  | 2   | 2            | 4   | 2            | 2   | 2             | 1   |
|     | 5.01 | 1            | 1   | 1                   | 1   | 1           | 4   | 2           | 1   | 1           | 1   | 1           | 1   | 1                     | 1   | 1                  | 1   | 1            | 1   | 1            | 1   | 1             | 1   |
| 8   | 7.04 | 4            | 4   | 7                   | 7   | 7           | 7   | 4           | *   | 4           | 4   | 5           | 4   | 2                     | 7   | 1                  | 4   | 2            | 4   | 2            | 4   | 4             | 4   |
|     | 6.01 | 1            | 2   | 1                   | 1   | 2           | 4   | 1           | 4   | 2           | 2   | 2           | 4   | 2                     | 2   | 2                  | 2   | 2            | 2   | 2            | 4   | 2             | 2   |
|     | 5.01 | 2            | 1   | 1                   | 7   | 2           | 1   | 2           | 7   | 2           | 2   | 1           | 4   | 2                     | 2   | 2                  | 2   | 2            | 1   | 2            | 1   | 2             | 2   |

|    |      |   |    |   |   |    |   |   |   |   |   |   |   |   |   |   |   |   |   |   |   |   |   |
|----|------|---|----|---|---|----|---|---|---|---|---|---|---|---|---|---|---|---|---|---|---|---|---|
| 9  | 7.04 | 2 | 4  | 1 | 4 | 1  | 1 | 2 | 2 | 2 | 4 | 1 | 7 | 2 | 2 | 2 | 2 | 2 | 4 | 2 | 4 | 2 | 2 |
|    | 6.01 | 1 | 2  | 1 | 4 | 2  | 1 | 1 | 2 | 2 | 2 | 1 | 2 | 2 | 4 | 1 | 2 | 1 | 1 | 1 | 2 | 1 | 1 |
|    | 5.01 | 1 | 1  | 1 | 1 | 2  | 1 | 1 | 2 | 1 | 1 | 1 | 1 | 7 | 4 | 1 | 2 | 1 | 1 | 1 | 1 | 1 | 1 |
| 10 | 7.04 | 4 | 4  | 4 | 7 | 2  | 4 | 4 | 7 | 2 | 2 | 4 | 7 | 2 | 2 | 2 | 2 | 4 | 4 | 3 | 4 | 4 | 4 |
|    | 6.01 | 3 | 2  | 2 | 2 | 4  | 1 | 2 | 7 | 4 | 2 | 2 | 2 | 4 | 1 | 3 | 2 | 3 | 4 | 3 | 4 | 4 | 2 |
|    | 5.01 | 2 | 2  | 2 | 2 | 2  | 2 | 2 | 4 | 3 | 2 | 2 | 4 | 3 | 2 | 2 | 2 | 2 | 2 | 2 | 2 | 2 | 2 |
| 11 | 7.04 | 7 | *  | 7 | * | 4  | 4 | 7 | 7 | 7 | 7 | 7 | 7 | 7 | * | 7 | 7 | 7 | 7 | 7 | 7 | 7 | 7 |
|    | 6.01 | 2 | 4  | 2 | 4 | 3  | 1 | 2 | 4 | 2 | 2 | 2 | 4 | 4 | 1 | 2 | 1 | 2 | 2 | 4 | 2 | 3 | 2 |
|    | 5.01 | 2 | 4  | 2 | 4 | 2  | 4 | 2 | 4 | 2 | 7 | 2 | 4 | 2 | 2 | 2 | 2 | 2 | 2 | 2 | 2 | 2 | 2 |
| 12 | 7.04 | 4 | 4  | 4 | 4 | 4  | 4 | 4 | 4 | 1 | 2 | 4 | 4 | 1 | 1 | 2 | 1 | 2 | 2 | 2 | 2 | 2 | 4 |
|    | 6.01 | 2 | 2  | 2 | 2 | 2  | 4 | 2 | 2 | 2 | 1 | 2 | 2 | 2 | 1 | 2 | 1 | 2 | 1 | 2 | 2 | 2 | 2 |
|    | 5.01 | 1 | 1  | 1 | 1 | 1  | 1 | 1 | 1 | 1 | 1 | 1 | 2 | 1 | 1 | 1 | 2 | 1 | 1 | 2 | 1 | 1 | 1 |
| 13 | 7.04 | 7 | 7  | 2 | 4 | 2  | 2 | 2 | 2 | 2 | 2 | 2 | 2 | 2 | 2 | 1 | 2 | 1 | 2 | 1 | 2 | 1 | 2 |
|    | 6.01 | 2 | 1  | 2 | 1 | 2  | 1 | 2 | 1 | 2 | 2 | 2 | 2 | 2 | 2 | 3 | 1 | 2 | 2 | 2 | 1 | 2 | 1 |
|    | 5.01 | 2 | 1  | 1 | 1 | 2  | 1 | 4 | 1 | 2 | 2 | 2 | 2 | 2 | 1 | 1 | 1 | 2 | 1 | 2 | 1 | 2 | 1 |
| 14 | 7.04 | 2 | 7  | 2 | 2 | 4  | 4 | 2 | 4 | 2 | 4 | 2 | 2 | 2 | 2 | 4 | 2 | 2 | 2 | 2 | 2 | 2 | 4 |
|    | 6.01 | 2 | 2  | 1 | 2 | 2  | 1 | 2 | 2 | 2 | 2 | 2 | 2 | 2 | 2 | 2 | 2 | 2 | 2 | 2 | 2 | 2 | 1 |
|    | 5.01 | 1 | 1  | 1 | 1 | 1  | 1 | 1 | 1 | 1 | 4 | 1 | 1 | 2 | 1 | 2 | 1 | 2 | 1 | 1 | 1 | 2 | 1 |
| 15 | 7.04 | 4 | 7  | 4 | 7 | 2  | 2 | 4 | 7 | 4 | 4 | 4 | 4 | 4 | 4 | 4 | 4 | 4 | 4 | 4 | 4 | 4 | 7 |
|    | 6.01 | 2 | 2  | 2 | 4 | 4  | 2 | 2 | * | 4 | 4 | 2 | 4 | 4 | 4 | 2 | 4 | 2 | 2 | 3 | 2 | 2 | 1 |
|    | 5.01 | 2 | 1  | 1 | 2 | 2  | 1 | 2 | 4 | 2 | 2 | 3 | 2 | 2 | 2 | 7 | 1 | 2 | 1 | 2 | 2 | 2 | 1 |
| 16 | 7.04 | 2 | 2  | 2 | 2 | 1  | 1 | 2 | 2 | 2 | 4 | 2 | 2 | 2 | 2 | 1 | 2 | 2 | 2 | 2 | 2 | 2 | 2 |
|    | 6.01 | 2 | 4  | 2 | 1 | 2  | 1 | 2 | 2 | 2 | 2 | 2 | 2 | 1 | 2 | 1 | 2 | 1 | 4 | 2 | 2 | 2 | 2 |
|    | 5.01 | 2 | *  | 2 | 2 | 2  | 1 | 2 | 1 | 2 | 1 | 2 | 2 | 1 | 1 | 1 | 1 | 1 | 1 | 2 | 1 | 2 | 1 |
| 17 | 7.04 | 2 | 2  | 2 | 2 | ** | * | 1 | 4 | 2 | 4 | 2 | 2 | 2 | 2 | 2 | 4 | 1 | 2 | 1 | 2 | 2 | 4 |
|    | 6.01 | 1 | 1  | 1 | 1 | 2  | 2 | 1 | 4 | 2 | 2 | 7 | 4 | 2 | 2 | 2 | 2 | 2 | 2 | 2 | 2 | 4 | 2 |
|    | 5.01 | 1 | ** | 2 | 1 | 2  | 1 | 1 | 1 | 1 | 1 | 1 | 1 | 1 | 1 | 2 | 1 | 1 | 1 | 2 | 1 | 2 | 1 |
| 18 | 7.04 | 2 | 2  | 2 | 4 | 1  | 1 | 2 | 4 | 2 | 2 | 1 | 2 | 2 | 2 | 2 | 2 | 1 | 2 | 2 | 2 | 2 | 2 |
|    | 6.01 | 1 | 4  | 1 | 2 | 1  | 4 | 1 | 2 | 2 | 2 | 1 | 2 | 3 | 2 | 2 | 2 | 2 | 2 | 2 | 2 | 2 | 1 |
|    | 5.01 | 1 | 4  | 1 | 2 | 1  | * | 1 | 2 | 1 | 1 | 1 | 1 | 2 | 4 | 3 | 2 | 1 | 1 | 1 | 1 | 1 | 1 |
| 19 | 7.04 | 4 | 4  | 4 | 4 | 2  | 2 | 2 | 4 | 4 | 4 | 2 | 4 | 4 | 4 | 2 | 4 | 4 | 4 | 4 | 4 | 4 | 4 |
|    | 6.01 | 2 | 7  | 2 | 4 | 2  | 1 | 2 | 4 | 2 | 4 | 2 | 2 | 3 | 2 | 2 | 4 | 2 | 4 | 2 | 4 | 2 | 4 |
|    | 5.01 | 1 | *  | 1 | 1 | 2  | 4 | 1 | 2 | 2 | 2 | 2 | 2 | 3 | 2 | 1 | 2 | 1 | 2 | 2 | 2 | 1 | 2 |

|    |      |   |    |   |   |   |   |   |   |   |   |   |   |   |   |   |   |   |   |    |   |   |   |   |
|----|------|---|----|---|---|---|---|---|---|---|---|---|---|---|---|---|---|---|---|----|---|---|---|---|
| 20 | 7.04 | 4 | 4  | 4 | 7 | 4 | 7 | 4 | 7 | 4 | 7 | 7 | 7 | 4 | 7 | 2 | 4 | 4 | 4 | 4  | 7 | 7 | 4 | 4 |
|    | 6.01 | 4 | 4  | 4 | 4 | 4 | 7 | 5 | 7 | 7 | 4 | 7 | 4 | 4 | 4 | 4 | 4 | 4 | 4 | 4  | 7 | 4 | 4 |   |
|    | 5.01 | 3 | 4  | 2 | 4 | 4 | 2 | 4 | 4 | 4 | 4 | 4 | 7 | 3 | 4 | 3 | 7 | 3 | 4 | 4  | 7 | 4 | 4 |   |
| 21 | 7.04 | 4 | 4  | 7 | 7 | 4 | 4 | 4 | 7 | 7 | 7 | 7 | 7 | 7 | 7 | 7 | 7 | 7 | 7 | 7  | 7 | 7 | 7 |   |
|    | 6.01 | 2 | ** | 2 | 2 | 2 | 7 | 2 | 4 | 2 | 2 | 2 | 2 | 1 | 2 | 1 | 2 | 1 | 2 | 1  | 2 | 1 | 2 |   |
|    | 5.01 | 1 | ** | 1 | 1 | 1 | 2 | 1 | 1 | 1 | 1 | 1 | 1 | 2 | 1 | 2 | 1 | 1 | 1 | 1  | 1 | 2 | 1 |   |
| 22 | 7.04 | 2 | 2  | 2 | 2 | 4 | 4 | 2 | 4 | 2 | 4 | 2 | 2 | 2 | 2 | 4 | 4 | 2 | 2 | 2  | 2 | 2 | 2 |   |
|    | 6.01 | 2 | *  | 2 | 2 | 2 | 1 | 2 | 2 | 2 | 2 | 2 | 4 | 2 | 1 | 1 | 4 | 1 | 2 | 2  | 2 | 2 | 2 |   |
|    | 5.01 | 1 | 4  | 1 | 1 | 2 | 1 | 1 | 1 | 2 | 1 | 1 | 1 | 1 | 1 | 1 | 1 | 1 | 1 | 1  | 1 | 1 | 1 |   |
| 23 | 7.04 | 2 | 7  | 2 | 2 | 1 | 2 | 2 | 2 | 2 | 2 | 2 | 2 | 2 | 2 | 2 | 1 | 3 | 4 | 2  | 4 | 2 | 7 |   |
|    | 6.01 | 7 | 4  | 5 | 2 | 4 | 1 | 2 | 2 | 4 | 2 | 2 | 2 | 1 | 2 | 1 | 2 | 1 | 2 | 1  | 2 | 1 | 2 |   |
|    | 5.01 | 2 | *  | 2 | 1 | 2 | 2 | 2 | 4 | 3 | 1 | 2 | 1 | 2 | 1 | 1 | 1 | 1 | 1 | 1  | 1 | 1 | 1 |   |
| 24 | 7.04 | 2 | ** | 1 | 1 | 1 | 1 | 2 | 2 | 2 | 2 | 2 | 2 | 2 | 2 | 1 | 1 | 4 | 4 | 1  | 2 | 1 | 2 |   |
|    | 6.01 | 2 | ** | 1 | 2 | 2 | 1 | 1 | 2 | 1 | 2 | 1 | 2 | 2 | 1 | 2 | 1 | 2 | 4 | 2  | 2 | 2 | 1 |   |
|    | 5.01 | 1 | ** | 1 | 1 | 2 | 1 | 1 | 1 | 1 | 1 | 1 | 1 | 2 | 1 | 1 | 1 | 1 | 2 | 1  | 1 | 1 | 1 |   |
| 25 | 7.04 | 2 | 4  | 2 | 2 | 1 | 1 | 2 | 7 | 2 | 2 | 2 | 2 | 2 | 2 | 2 | 2 | 2 | 2 | 2  | 2 | 2 | 2 |   |
|    | 6.01 | 2 | *  | 3 | 7 | 4 | 4 | 4 | 2 | 4 | 2 | 4 | 2 | 2 | 1 | 2 | 2 | 2 | 2 | 2  | 1 | 2 | 1 |   |
|    | 5.01 | 2 | ** | 2 | 1 | 2 | 4 | 2 | 1 | 2 | 1 | 2 | 1 | 2 | 1 | 2 | 1 | 1 | 1 | 2  | 1 | 2 | 1 |   |
| 26 | 7.04 | 1 | 2  | 1 | 2 | 2 | 4 | 4 | 7 | 2 | 2 | 2 | 2 | 4 | 4 | 2 | 2 | 2 | 2 | 2  | 2 | 2 | 2 |   |
|    | 6.01 | 2 | 4  | 2 | 2 | 2 | 7 | 2 | 4 | 2 | 4 | 1 | 2 | 1 | 2 | 1 | 2 | 2 | 2 | 2  | 2 | 1 | 2 |   |
|    | 5.01 | 2 | *  | 1 | 1 | 2 | 1 | 2 | 2 | 2 | 2 | 1 | 1 | 1 | 2 | 1 | 1 | 1 | 2 | 1  | 2 | 1 | 1 |   |
| 27 | 7.04 | 7 | *  | 2 | * | 2 | * | 2 | * | 4 | * | 2 | * | 4 | * | 4 | 7 | 4 | 7 | ** | * | 2 | 2 |   |
|    | 6.01 | 1 | *  | 2 | 2 | 3 | 7 | 2 | 2 | 2 | 2 | 2 | 2 | 2 | 2 | 2 | 4 | 2 | 2 | 2  | 2 | 4 | 2 |   |
|    | 5.01 | 1 | ** | 1 | 1 | 2 | 1 | 1 | 1 | 2 | 1 | 1 | 1 | 2 | 2 | 2 | 4 | 2 | 2 | 2  | 2 | 2 | 1 |   |
| 28 | 7.04 | 1 | *  | 2 | 4 | 2 | 2 | 4 | 7 | 4 | 4 | 2 | 7 | 4 | 4 | 2 | 4 | 4 | 4 | 4  | 4 | 4 | 4 |   |
|    | 6.01 | 4 | 2  | 2 | 2 | 4 | 2 | 4 | 4 | 4 | 4 | 2 | 4 | 2 | 2 | 2 | 4 | 2 | 2 | 2  | 4 | 2 | 4 |   |
|    | 5.01 | 2 | ** | 2 | 2 | 2 | 7 | 2 | 4 | 2 | 2 | 2 | 2 | 2 | 2 | 2 | 2 | 2 | 2 | 2  | 2 | 2 | 2 |   |
| 29 | 7.04 | 2 | *  | 2 | 4 | 2 | 2 | 2 | 7 | 2 | 4 | 2 | 7 | 4 | 4 | 4 | 4 | 4 | 4 | 4  | 4 | 4 | 4 |   |
|    | 6.01 | 2 | *  | 2 | 2 | 2 | 2 | 2 | 4 | 3 | 4 | 2 | 4 | 4 | 2 | 4 | 2 | 4 | 2 | 4  | 2 | 4 | 2 |   |
|    | 5.01 | 2 | 7  | 2 | 2 | 3 | 1 | 3 | 4 | 2 | 2 | 2 | 2 | 3 | 2 | 2 | 2 | 2 | 2 | 2  | 1 | 2 | 2 |   |
| 30 | 7.04 | 4 | 7  | 2 | 4 | 2 | 2 | 2 | 4 | 2 | 4 | 2 | 4 | 4 | 4 | 4 | 4 | 4 | 4 | 3  | 4 | 4 | 4 |   |
|    | 6.01 | 2 | 2  | 2 | 2 | 2 | 1 | 2 | 7 | 2 | 7 | 2 | 7 | 4 | 7 | 4 | 4 | 2 | 4 | 4  | 4 | 4 | 2 |   |
|    | 5.01 | 1 | *  | 2 | 2 | 2 | 2 | 2 | 2 | 2 | 4 | 2 | 2 | 2 | 2 | 2 | 2 | 2 | 2 | 2  | 2 | 2 | 1 |   |

|    |      |   |   |   |   |   |   |   |   |   |   |   |   |   |   |   |   |   |   |   |   |   |   |
|----|------|---|---|---|---|---|---|---|---|---|---|---|---|---|---|---|---|---|---|---|---|---|---|
| 31 | 7.04 | 2 | 7 | 2 | 7 | 7 | 4 | 2 | 7 | 2 | * | 2 | 4 | 4 | 4 | 2 | 4 | 2 | 4 | 2 | 4 | 4 | 4 |
|    | 6.01 | 7 | 2 | 7 | 2 | 7 | 1 | 7 | 2 | 7 | 4 | 7 | 4 | 2 | 2 | 2 | 2 | 2 | 2 | 2 | 2 | 2 | 2 |
|    | 5.01 | 3 | 4 | 3 | 1 | 4 | 7 | 3 | 1 | 4 | 2 | 4 | 2 | 1 | 2 | 1 | 1 | 1 | 2 | 1 | 1 | 1 | 2 |

Range identification: **1**:1-100 µg/ml; **2**: 101-200 µg/ml. **3**: 201-300 µg/ml; **4**: 301-400 µg/ml; **5**: 401-500 µg/ml; **6**: 501-600 µg/ml; **7**: 601-700 µg/ml; \*: 1250 µg/ml; \*\*: 2500 µg/ml
